# Supplementary material for: IR-Supported Thermogravimetric Analysis of Water in Hydrogels
Source: Frontiers journal article supplement (doi:10.3389/fmats.2022.931303), 2022-07-06
Supplement: Table_1.DOCX [file Table_1.DOCX]

Supplementary Material

**The determination of the composition of hydrogels**

**Calibration solutions**

Stock solutions of native hyaluronan of two different molecular weights (LMW and HMW) and Septonex were prepared in deionized water (UltraPure water system,) to a concentration of 1% (wt/vol) and 500 mM, respectively.

Calibration solutions of hyaluronan were prepared at the concentration range between 0.01–0.2% (wt/vol) for the HMW-hyaluronan and 0.01–1 (wt/vol) for the LMW hyaluronan. Furthermore, the calibration solutions of Septonex in the range 1–30 mM were prepared.

**ATR-FTIR spectroscopy**

The ATR-FTIR technique was used for measurement of calibration curves. Fourier transform infrared (FTIR) spectra of the solutions were recorded on Nicolet *i*S50 spectrometer (Thermo Fisher Scientific, Waltham, MA, USA) using the Attenuated Total Reflectance (ATR) measuring technique (single-reflection built-in diamond ATR crystal). All measurements were taken at 25°C in the spectral range 4000–400 cm–1 at 4 cm−1 resolutions as an average of 64 scans. For steady-state measurement, a very small amount (exactly 0.4 μl) of the calibration solution was placed directly on the clean dry surface of the diamond ATR crystal. After evaporated solvent (water) from sample measurement was started.

Calibration curves are shown in supplementary figures S1-S3.





**Supplementary Figure S1**: Calibration curve for HMW hyaluronan at frequencies characteristic for alcoholic functional group (C–O at 1042 cm−1).





**Supplementary Figure S2**: Calibration curve for LMW hyaluronan at frequencies characteristic for alcoholic functional group (C–O at 1042 cm−1).





**Supplementary Figure S3**: Calibration curve for Septonex at frequencies characteristic for aliphatic ester functional group (C=O at 1738 cm−1).


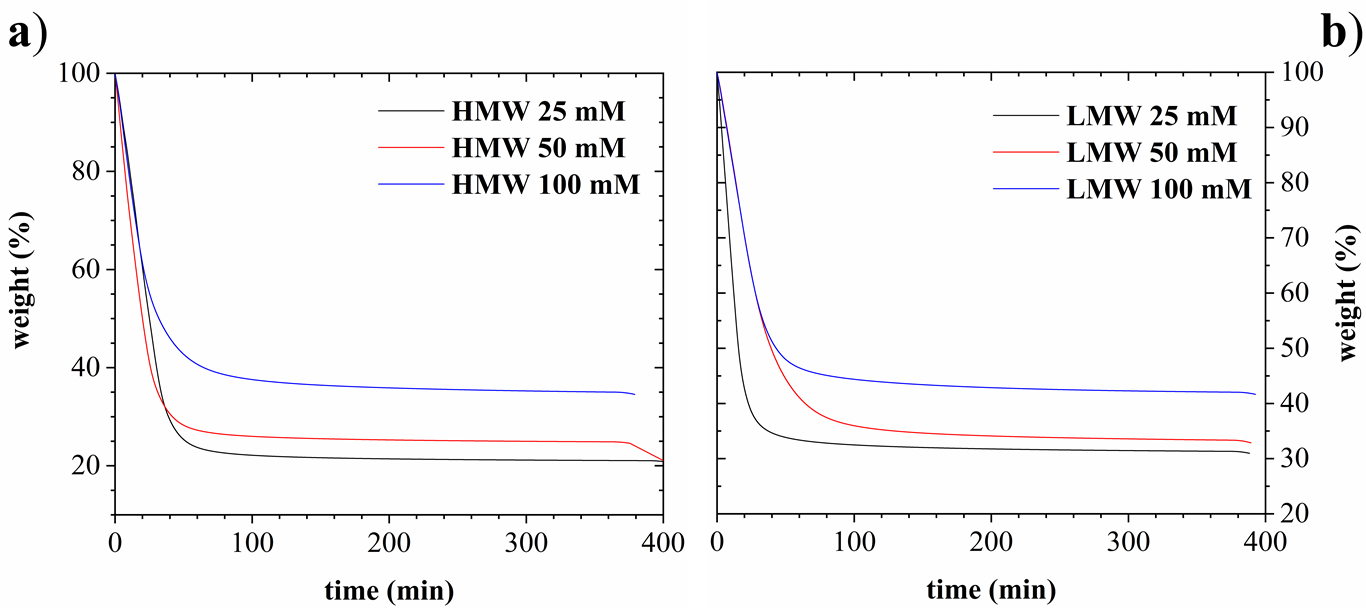


**Supplementary Figure S4**: Total part (0–360 min) of raw TGA thermograms recorded during isothermal drying of all tested hydrogels, (**a**) hydrogels prepared using high molecular weight hyaluronan, (**b**) hydrogels prepared using low molecular weight hyaluronan.

**Table S1**: Summary of the infrared band positions for the hyaluronan/Septonex hydrogels.

| **band position (cm–1)** | **assignment** |
| --- | --- |
| 3700–3100 | O–H stretching of bulk water molecules  N–H stretching of secondary amide groups |
| 2923 | C–H asymmetric stretching of –CH2– groups |
| 2853 | C–H symmetric stretching of –CH2– groups |
| 1738 | C=O symmetric stretching of alkyl-ester |
| 1636 | O–H bending of bulk water molecules |
| 1605 | – asymmetric stretching of carboxylate ion |
| 1566 | N–H bending of secondary amide groups |
| 1467 | C–H asymmetric and symmetric bending of –CH3 and –CH2–groups |
| 1406 | – symmetric stretching of carboxylate ion |
| 1375 | C–H symmetric (umbrella) bending of –CH3 groups |
| 1340 | C–H bending of methyne groups |
| 1245 | C–C–O symmetric stretching of alkyl-ester |
| 1200 | C–N stretching of tertiary amine groups |
| 1154 | C–O–C asymmetric stretching of glycosidic groups |
| 1082 | C–O stretching of secondary alcohols and/or C–O–C stretching of polysaccharide ring |
| 1042 | C–O stretching of primary alcohols |
